# Supplementary material
Source: publisher site journal article supplement (https://www.dovepress.com/article/323436)
Supplement: Supplementary file 1 [file get_supplementary_file.php]

# Supplementary materials


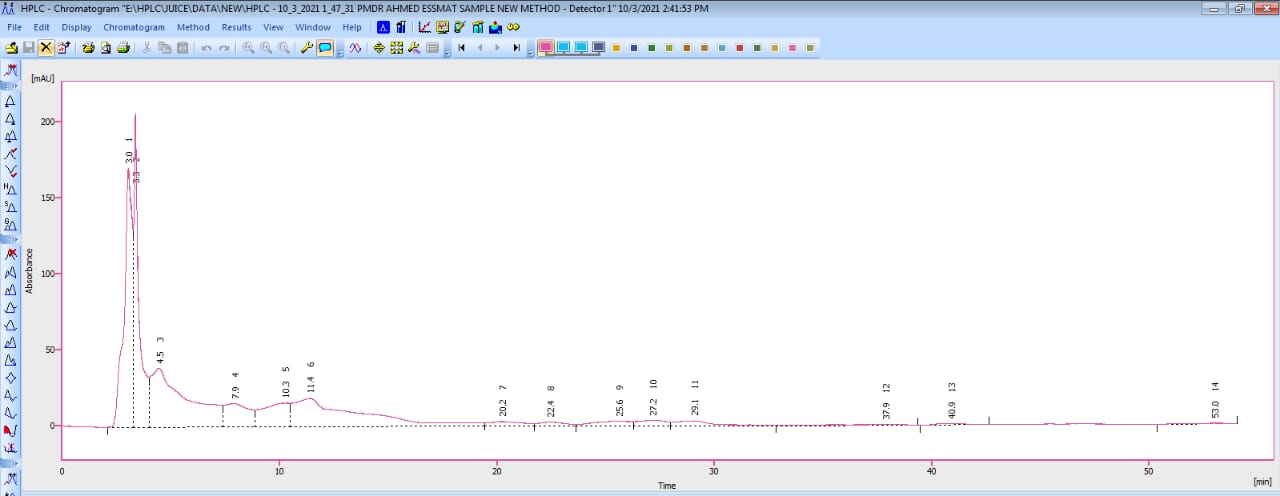


Figure S1: HPLC finger print for monoamines and its metabolites in the hippocampal tissue.


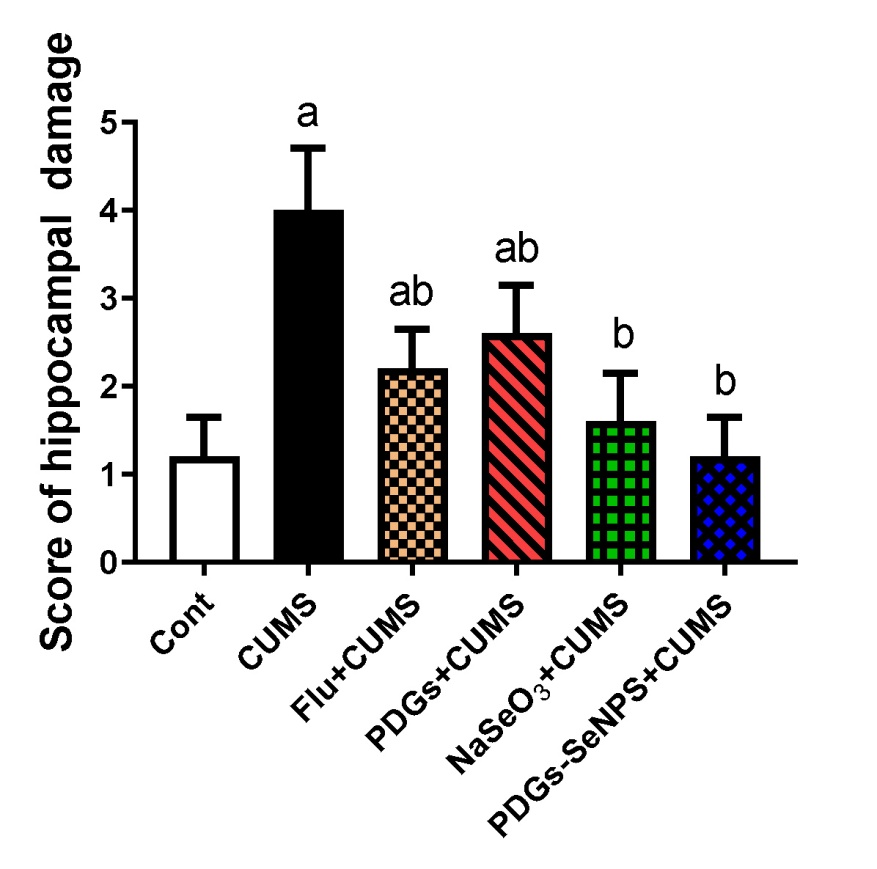


Figure S2: Score of hippocampal damage as measured by using a semi-quantitative scoring system. Data were analyzed using one-way ANOVA, followed by Duncan’s post hoc test (p< 0.05), and are expressed as the mean ± SD (n=10 field of 3 rats/group). a significant difference relative to the control group (Non-stressed). b significant difference relative to the CUMS group (depression model).
